# Supplementary material for: The altered gut microbiota of high-purine-induced hyperuricemia rats and its correlation with hyperuricemia
Source: PeerJ. 2020 Mar 6;8:e8664. doi: 10.7717/peerj.8664 (PMC7061907; doi:10.7717/peerj.8664)
Supplement: Data S1 — N, normal group; HUA, hyperuricemia group; UA, uric acid; [file peerj-08-8664-s007.xlsx]

## Sheet: UA
	UA
N	172	259	211	165	204	259	189	184	162	152	207	208	148	169	235	161	149	160	165
HUA	321	356	346	379	312	277	342	265	261	305	310	298	302	311	345	290	243	245	331	355	340	375	335	310	300	257	275	302	376
N, normal group; HUA, hyperuricemia group;
UA, uric acid;
