# Supplementary material for: The altered gut microbiota of high-purine-induced hyperuricemia rats and its correlation with hyperuricemia
Source: PeerJ. 2020 Mar 6;8:e8664. doi: 10.7717/peerj.8664 (PMC7061907; doi:10.7717/peerj.8664)
Supplement: Data S2 — N, normal group; HUA, hyperuricemia group; Ab+HUA, antibiotic-fed hyperuricemia group; Ab+N, antibiotic-fed normal group; UA, uric acid; Cr, creatinine; BUN, blood urea nitrogen; HDL, high density lipoprotein; LDL, low density lipoprotein; [file peerj-08-8664-s008.xlsx]

## Sheet: UA
	week one	week two	week three	week four	week five
N	203	169
	218
	199	177	178	166	154
	198
	188		214	213	213
	211
	209	199
	210	189	195	186	177
HUA	157	306
	162		312
	181	276
	224	298	290	286
	214	340	307
	212	323	344
	213	312	335	317	300
	184		350	361
	263				293
	194
				342	323
Ab+HUA	186		281
	196	273	264	281	299
	182		271	281	292
	225	289	324	283	243
	141	223	312	293	275
	198	297	305
	172	299	278	276	274
	160		269	218
	206		292	168
Ab+N	227		267	198	169
		165	183		154
	217	200	231	174	164
	229		195		177
			185		165
	211	216
	229
		211			179
N, normal group; HUA, hyperuricemia group; Ab+HUA, antibiotic-fed hyperuricemia group; Ab+N, antibiotic-fed normal group;
UA, uric acid; Cr, creatinine; BUN, blood urea nitrogen; HDL, high density lipoprotein; LDL, low density lipoprotein;

## Sheet: Cr
	week one	week two	week three	week four	week five
N	49.3
	48.1	55.8	57.4	54.6	51.8
	55.6
	49.3	58.8	64.5	60.6	56.7
	49.3		54.5
	49.3	55.8	56	54.5	53
	51.9
	48.1	54.3	54.5	53.75	53
	50.6	54.3	54.5	52.55	50.6
HUA	44.3	103.4	89.9	153.1	216.3
	46.8	93	73	95.3	117.6
	49.3	112.3	138.1
	51.9	78.1	84.3	97.3
	50.6	109.4	106.9
	50.6	109.4	122.5	157.2	191.9
	50.6	87	85.7	102.25	118.8
	53.1	82.6	108.4	142.25	176.1
	54.4	69.2	94.2	103.45	112.7
	51.9	75.1	74.4	114.85	155.3
Ab+HUA	44.3		153.6
	44.3	81.1	66.4	76.75
	50.6		92.4	137.9	183.4
	53.1		109.4	148.2	187
	41.7	93	82	108.9	135.8
	50.6	72.2	87.2
	43	137.6	125	167.6	210.2
	49.3	119.8	109.4	126.9	144.4
	49.3	94.5	143.2
Ab+N	45.5	55.8	57.3	55.15	53
	49.3		52.1	53.75	55.4
	45.5	55.8	48.2	51.8	55.4
	50.6		54.7
	40.5	55.8	41.7	47.35	53
	48.1	52.8			50.6
	46.8
	48.1	52.8			51.8

## Sheet: BUN
	week one	week two	week three	week four	week five
N	3.43
	3.51	4.28	4.33	4.42	4.51
	3.82
	4.49	5.32	5.99	6.185	6.38
	4.24		5.42
	3.97	4.33	4.97	5.28	5.59
	3.54
	4.91	6.23	6.18	6.295	6.41
	4.38	5.27	6.33	6.13	5.93
HUA	4.39	18.89	19.37	29.08
	4.61	13.31	10.53	17.25	23.97
	4.52	17.24	17.14
	4.61		13.53	16.045
	4.52	18.1	13.64
	4.43	17.67			33.21
	3.96	13.06	15.34	18.09	20.84
	5	12.81	18.31		32.34
	6.02	12.73		22.41	25.42
	4.96	8.26	10.26	18.825	27.39
Ab+HUA	5.44
	4.2	17.21	12.35
	5.7		15.75	23.365	30.98
	4.24		20.13	26.39	32.65
	4.11	15.68	12.99	19.36	25.73
	3.94		14.29
	6.23
	4.39	21.87	20.42
	6.35	14.1	22.65
Ab+N	5.39	4.58	5.93	6.385	6.84
	3.73		5.32	6.565	7.81
	4.96	7.16	6.33	7.705	9.08
	6.01		6.61
	3.93	6.86	3.78	5.215	6.65
	4.27	5.59			6.44
	4.68
	4.23	5.72			5.98

## Sheet: HDL
	week one	week two	week three	week four	week five
N	1.38
	1.33	1.19	1.2	1.26	1.32
	1.16
	1.29	1.15	1.19	1.285	1.38
	1.1		1.04
	1.42	1.45	1.31	1.385	1.46
	1.42
	1.22	1.43	1.35	1.39	1.43
	1.17	1.45	1.48	1.425	1.37
HUA	1.38	1.29	2.1
	1.49	1.71	1.81		2.16
	1.47	1.75	2.16	2.085	2.01
	1.53	2.06	2.13	2.01
	1.39
	1.24	1.41	2.14	2.355
	1.35	1.64	2.12	2.235	2.35
	1.41	1.52			1.94
	0.98
	0.99	1.46
Ab+HUA	1.64	1.77		1.925	1.64
	1.27	1.48	1.55	1.71	1.87
	1.35	1.65	1.95
		1.56
	1.37		1.7	1.92	2.14
	1.29	1.62	1.62	1.665	1.71
	1.37	1.65	1.48
	1.46	1.73	1.46	1.88
	1.35			1.54
	1.3		1.59
Ab+N	1.55	1.48	1.39	1.5
	1.24		1.36	1.56	1.76
	1.45	1.53	1.2	1.46	1.72
	0.97		1.2
	1.37	1.5	1.27	1.5	1.73
	1.52	1.18			1.74
	0.97
	0.92	1.09

## Sheet: LDL
	week one	week two	week three	week four	week five
N	0.42
	0.46	0.37	0.44	0.415	0.39
	0.32
	0.39	0.41		0.455	0.35
	0.32		0.42
	0.39	0.4		0.455
	0.46
	0.41	0.5	0.42		0.43
	0.38		0.47	0.4	0.33
HUA	0.37		0.57	0.54	0.51
	0.45	0.47	0.51	0.54	0.51
	0.52	0.57		0.47	0.59
	0.55			0.58
	0.41	0.53			0.66
	0.34		0.57	0.665
	0.4	0.46	0.62	0.56	0.5
	0.43			0.575
	0.39		0.63	0.565	0.5
	0.39	0.53			0.5
Ab+HUA	0.44	0.56			0.56
	0.41		0.54
	0.32		0.54	0.54	0.54
	0.31	0.54	0.58	0.53	0.48
	0.44		0.55	0.55	0.55
	0.37	0.49
	0.36		0.61	0.55	0.49
	0.29	0.52		0.645	0.63
	0.33	0.47
Ab+N	0.35	0.46	0.42	0.415	0.41
	0.31			0.49	0.34
	0.49	0.29	0.32	0.41
	0.31		0.49
				0.35	0.42
	0.31	0.5			0.45
	0.31
		0.49
N, normal group; HUA, hyperuricemia group; Ab+HUA, antibiotic-fed hyperuricemia group; Ab+N, antibiotic-fed normal group;
UA, uric acid; Cr, creatinine; BUN, blood urea nitrogen; HDL, high density lipoprotein; LDL, low density lipoprotein
