# Supplementary material for: The altered gut microbiota of high-purine-induced hyperuricemia rats and its correlation with hyperuricemia
Source: PeerJ. 2020 Mar 6;8:e8664. doi: 10.7717/peerj.8664 (PMC7061907; doi:10.7717/peerj.8664)
Supplement: Data S3 — HMT and NMT,hyperuricemia and normal microbiota transplantation group, respectively. UA, uric acid; Cr, creatinine; BUN, blood urea nitrogen; HDL, high density lipoprotein; LDL, low density lipoprotein; [file peerj-08-8664-s009.xlsx]

## Sheet: UA
	week one	week three	week five	week seven
NMT	148
	182	161	173	181
		150	165	157
	165	186	169
	169	157		181
	154	133	170	143
	165	169	174	202
HMT	168
	164
	178	165	207	188
		184	200	193
		150		149
		141	194
		130		164
		160	173	153
HMT and NMT,hyperuricemia and normal microbiota transplantation group, respectively.
UA, uric acid; Cr, creatinine; BUN, blood urea nitrogen; HDL, high density lipoprotein; LDL, low density lipoprotein;

## Sheet: Cr
NMT
	55.8		50	60.5
		55.8	55	64.3
		49.7	51.3
	51.3	49.7	51.3	60.5
		44.9	47.6	58
	55.8	50.9	53.7	63.1
HMT	49.8
	57.3	47.3	50	58
		50.9	51.3	60.5
	51.3	46.1	46.3	55.4
		47.3	51.3
	51.3	47.3	48.8	58
	46.9	48.5	51.3	55.4

## Sheet: BUN
NMT
	5.65		5.94	5.84
	5.7		5.74	7
		5.04	5.51
	4.62	5.55	6.1	5.67
	4.76	5.87		5.58
		6.5		6.08
HMT	4.89
	4.33	5.4	6.72	5.21
		5.43		7.21
	4.35	5.07	5.8	5.57
	5.39	4.24	6.48
		5.42	6.86	5.86
	3.58	5.29	5.06	5.02

## Sheet: HDL
NMT
	1.37		1.61	1.44
		1.47		1.68
	1.34		1.49
	1.41	1.35	1.63	1.63
	1.12	1.24	1.46
	1.39	1.48		1.82
HMT	1.28
	1.21	1.2	1.3	1.58
		1.53
	1.21	1.23	1.4
		1.4	1.58
	1.49	1.5		1.8
	1.19	1.26	1.61	1.63

## Sheet: LDL
	week one	week three	week five	week seven
NMT	0.47	0.37
			0.35	0.4
	0.36	0.39	0.32	0.35
	0.3	0.41	0.29
	0.37	0.37	0.44	0.41
	0.4		0.39	0.39
			0.52	0.53
HMT	0.36
	0.45	0.34	0.42	0.41
		0.47	0.43	0.47
	0.4	0.37	0.44	0.4
			0.64
	0.35		0.39	0.4
	0.4		0.46	0.39
HMT and NMT, hyperuricemia and normal microbiota transplantation group, respectively.
UA, uric acid; Cr, creatinine; BUN, blood urea nitrogen; HDL, high density lipoprotein; LDL, low density lipoprotein
